# Supplementary material for: Spatially contrasted response of Devonian anoxia to astronomical forcing
Source: Copernicus journal article supplement (doi:10.5194/egusphere-2025-4238), 2025-09-02
Supplement: Supplementary file [file egusphere-2025-4238-AC2-supplement.pdf]

# Review of “Spatially contrasted response of Devonian anoxia to astronomical forcing”. Justin Gérard et al. 2025, for Climate of the Past

## First Reviewer: Anonymous Referee #1

In this manuscript, Gérard et al. explore the impact of astronomical parameters on marine oxygen levels in a Devonian context using cGENIE model experiments with an updated, emulator-based, weathering scheme. The 1.1 Myr transient cGENIE simulations are forced with prescribed surface albedo and wind stress from a specific HadCM3 simulation of Valdes et al. (2021) and variable continental phosphorus inputs that evolve following a 1.1 Myr synthetic Devonian astronomical forcing that includes transitions between 405-kyr-modulated 100-kyr cycles and a 2.4-Myr eccentricity node without 100-kyr cycles. Following the methods described in Sablon et al. (2025), the phosphorus inputs to the ocean are emulated based on GEOCLIM simulations forced with climate conditions obtained from HadSM3 simulations with various combinations of orbital parameters and CO<sub>2</sub>. 3 simulations are evaluated with either the full orbital parameters evolving together or either obliquity or eccentricity/precession fixed to their mean values across the 1.1 Myr astronomical solution. The main result is that astronomy weakly influence the global mean concentration in O<sub>2</sub> and PO<sub>4</sub> but may have a greater impact on regional water mass characteristics, via inputs of weathered PO<sub>4</sub> to the proximal ocean. The results support the hypothesis that Late Devonian anoxic events occurred close to eccentricity maxima as the latter forcing yields the largest anoxic volume in the simulations discussed in this manuscript.

I think this manuscript is worthy of publication after revisions. I have particularly liked the key message that the astronomical signal may have different regional expression on oceanic PO<sub>4</sub> and O<sub>2</sub>. The links between the astronomical forcing and the simulated PO<sub>4</sub> and O<sub>2</sub> ocean concentrations are adequately illustrated, even if they are somehow expected from the start given the simplicity of the nutrient cycle – marine productivity is function of the concentration of PO<sub>4</sub> – and that the astronomically-varying input of PO<sub>4</sub> to the ocean is the only transient forcing across the simulations. The regional analysis is interesting but the impact of astronomy on O<sub>2</sub> variability is in my opinion a bit oversold in some of the regions discussed.

[We thank the Reviewer for its overall positive evaluation of the manuscript and constructive comments.](#)

My major concern is about the absence of astronomically-varying climate change in the simulations. If I understand correctly, the surface albedo and wind stress field are prescribed using outputs from a Devonian HadCM3 simulation with the same CO<sub>2</sub> as Valdes et al. (2021) – which is what exactly? because Valdes et al. present 370 Ma simulations with 2 different pCO<sub>2</sub> of 926 and 811 ppmv – and orbital values of 0 and 23° for eccentricity and obliquity and a longitude of perihelion of 0°. Now with very different orbital parameters, e.g. high eccentricity and/or obliquity, albedo and wind stress will change, perhaps significantly, and I suspect that

it would drive ocean circulation changes leading to changes in marine O<sub>2</sub> concentrations of at least similar, if not much larger, amplitude.

First, we acknowledge that additional clarification should have been provided regarding the exact experiment from Valdes et al. (2021) used to prescribe the surface boundary conditions. The atmospheric fields used as boundary conditions in GENIE are derived from the simulation with a pCO<sub>2</sub> of 926 ppm. We will therefore revise the manuscript as follows:

Line 102: "The surface albedo and zonally averaged wind stress profiles are prescribed from the HadCM3L simulation of Sablon et al. (2025), conducted with the same pCO<sub>2</sub> (926 ppm) as in Valdes et al. (2021) and an orbital configuration characterized by an eccentricity of 0, a longitude of perihelion of 0°, and an obliquity of 23°."

Second, the Reviewer's concern regarding the absence of astronomically-varying climate change in our simulations, particularly the lack of orbital modulation of wind stress and albedo, is entirely sounded. However, we kept these fields constant for two main reasons. (1) These GCM-derived fields already represent a substantial improvement over the idealized fields generated by default in muffle (the GENIE boundary condition generator – <https://zenodo.org/records/5500687>) and used in previous Devonian studies (Gérard et al., 2025; their Fig. 1) and other work (Cermeno et al., 2022). These idealized fields consist of a simplified zonally averaged wind stress profile and an albedo field that depends only on latitude. (2) More importantly, our intent in this contribution is to test the hypothesis proposed in the data community, that the main mechanism by which astronomical forcing influences ocean anoxia is through variations in nutrient fluxes from the continents to the ocean. This "top-down" mechanism has been proposed and supported in several studies, including Carmichael et al. (2019) and De Vleeschouwer et al. (2017) for the Frasnian-Famennian boundary, Monteiro et al. (2012) for Oceanic Anoxic Event 2, and Hülse et al. (2021) for the Permian-Triassic boundary. In this context, holding albedo and wind stress invariant through time allows us to better isolate and quantify the exact impact of this mechanism without the confounding influence of circulation-induced feedbacks. The focus on the "top-down" hypothesis is already made explicit in the manuscript (line 3): "Here, we explore how astronomical forcing influences ocean oxygenation by modulating the continental weathering flux of phosphate within a Late Devonian climate framework."

We do realize that keeping these fields constant constitutes an important assumption of our current setup, and therefore acknowledge this point in the manuscript (lines 356-365). To best address the Reviewer's concern, we revised the introduction to summarise the main mechanism through which astronomical forcing could influence anoxia and expanded the discussion to better remind the goal of the study and further motivate the use of dynamic albedo and wind-stress profiles in future work.

Lines 26-27: "There is also growing evidence that astronomical forcing could modulate at least some of these events, primarily through a "top-down" mechanism (Carmichael et al., 2019) whereby cyclic changes in temperature and precipitation alter continental nutrient fluxes to the ocean (De Vleeschouwer et al., 2014; De Vleeschouwer et al., 2017; Wichern et al., 2024; Huygh et al., 2025)."

Lines 344-346: "The wind stress field and albedo profile, while taken from HadCM3L simulations (Valdes et al., 2021), are prescribed and unresponsive to climate variability. Yet this simplification enables a clearer isolation of the influence of astronomically paced nutrient fluxes on Devonian anoxia."

Lines 363-364: "...better connect orbital forcing with ocean anoxia. For instance, subsequent work would benefit from incorporating dynamic albedo and wind-stress profiles when exploring the full range of climate-circulation-biogeochemistry interactions."

Cermeño, P., García-Comas, C., Pohl, A. et al. Post-extinction recovery of the Phanerozoic oceans and biodiversity hotspots. *Nature* 607, 507–511 (2022). <https://doi.org/10.1038/s41586-022-04932-6>

Hülse, D., Lau, K.V., van de Velde, S.J. et al. End-Permian marine extinction due to temperature-driven nutrient recycling and euxinia. *Nat. Geosci.* 14, 862–867 (2021). <https://doi.org/10.1038/s41561-021-00829-7>

Monteiro, F.M., Pancost, R.D., Ridgwell, A., Donnadieu, Y., 2012. Nutrients as the dominant control on the spread of anoxia and euxinia across the Cenomanian- Turonian oceanic anoxic event (OAE2): model-data comparison. *Paleoceanography* 27 (4), PA4209

Given the numerous HadCM3 simulations with different orbital parameters that I suppose available to the authors from what is written in this manuscript and in Sablon et al. (2025), I suggest to perform at least one cGENIE simulation with prescribed wind stress and albedo from a simulation with an ‘extreme’ orbital configuration among those available in the HadCM3 ensemble to evaluate how dynamical changes in ocean circulation affect  $\text{PO}_4$  and  $\text{O}_2$  in the regions defined in Fig. 4, as well as globally.

We thank Reviewer 1 for this interesting suggestion. We performed an additional experiment using the wind stress and albedo fields from a HadCM3L simulation forced with an extreme orbital configuration characterized by an eccentricity set to 0.08, an obliquity of  $25^\circ$  and a precession of  $45^\circ$ , to be compared with respectively 0,  $23^\circ$  and  $0^\circ$  in our original simulation. The consideration for such extreme orbital configurations is required for designing the emulator of Sablon et al., 2025, now accepted.

In this new simulation, only these fields were changed compared with the baseline simulations presented in this study, allowing us to specifically capture their impact on  $[\text{O}_2]$ . On the global scale, the difference in mean  $[\text{O}_2]$  between the two simulations is  $3 \mu\text{mol.kg}^{-1}$ . At the regional scale, we find variations of 16, 3, 9, 8, and  $10 \mu\text{mol.kg}^{-1}$  for regions SA, WL, Si, NP, and LG, respectively. These values can be directly compared to the  $[\text{O}_2]$  variability induced by astronomically driven weathering changes in our main experiments, where global-scale variations reach  $5 \mu\text{mol.kg}^{-1}$  and regional amplitudes reach 45, 9, 6, 7, and  $19 \mu\text{mol.kg}^{-1}$  for the same five regions.

Taken together, these results show that changes in wind stress and albedo do exert an influence on  $[\text{O}_2]$ , but their effect is generally smaller than that associated with orbitally driven changes in continental phosphate weathering, particularly in regions exhibiting the largest  $[\text{O}_2]$  variability (SA and LG). Most importantly, the numbers obtained here are uppermost end-members, as they were obtained under extreme orbital conditions that typically never occurred during the Devonian. We concede that, although this analysis falls beyond the scope of the present study, it further underscores the relevance of the proposed expansion of the discussion in response to the previous comment (lines 363-364).

A related question is how does the transient astronomical changes affect the ocean circulation via local insolation and freshwater fluxes, as I guess the cGENIE atmospheric EMB still operates across the model runs? With the wind stress field prescribed, do these heat and freshwater fluxes lead to changes in ocean convection zones? If yes, does this play a role in the  $\text{O}_2$  variability in the SA region? More generally, I think some ocean diagnostics could be useful to get a basic idea about the ocean circulation of this Devonian simulation.

Reviewer 1 is right, the EMBM of cGENIE remains active throughout the transient simulations, and as a result, ocean circulation evolves in response to the changing astronomical parameters. However, these variations remain minor, with a maximum change in overturning strength of 0.7 Sv when all astronomical parameters vary together (0.56 Sv with eccentricity + precession only, and 0.32 Sv with obliquity alone). This limited sensitivity is consistent with the results reported in our previous, dedicated investigation of the role of astronomical forcing on Devonian ocean circulation and anoxia (Gérard et al., 2025; their Fig. 7c). Importantly,  $[O_2]$  variability in region SA shows a strong correlation ( $R^2 = 0.81$  and p-value  $< 10^{-3}$ ) with regional biological productivity. These results indicate that while ocean circulation likely contributes to regional  $[O_2]$  changes, its influence is secondary compared to nutrient-driven processes. Isolating the specific role of circulation variability would require a dedicated analysis and is outside the primary objectives of the present study, which is to test the sensitivity of Devonian anoxia to astronomically-paced nutrient fluxes. This point has been clarified in the revised version of the manuscript in response to the Reviewer’s previous points.

Nevertheless, the large-scale circulation patterns described in Gérard et al. (2025, see their series of simulations "Scot370M") remain directly applicable here, given the continental configuration used. We acknowledge that recalling this information in the main text will improve clarity, and therefore propose adding the following clarification:

Line 98: "... 370 Ma (see Fig. 1). As this continental reconstruction was also used in Gérard et al. (2025), the large-scale ocean circulation patterns and associated diagnostics described there remain valid here; for instance, the overturning circulation shows only limited sensitivity to temperature changes (see their Fig. 7c)."

Other comments.

#### 1. Methods section.

The climate-weathering emulator construction is not very clear. The authors refer to Sablon et al. 2025 for the detailed description, which is fine, but the information laid out in this manuscript are ambiguous and/or not sufficiently detailed. Was HadSM3 or HadCM3, or both, used to construct the surface climate? If the methodology follows Sablon then it is probably the two of them but this should explicitly appear in the manuscript. If not, then how the procedure differs from Sablon must be clarified.

In the revised manuscript, we will clarify and streamline the description of the emulator, focusing specifically on the weathering fluxes it provides within our modelling framework and explicitly stating its reliance on the three models (HadCM3BL, HadSM3, and GEOCLIM). All methodological and coupling details will remain fully described in Sablon et al. (2025), ensuring a concise yet transparent presentation in the present study. The revised text will read as follows:

Lines 76-85: "Specifically, we used the framework described in Sablon et al. (2025) to couple cGENIE with a climate-weathering emulator. This emulator computes weathering fluxes under varying boundary conditions (orbital parameters and  $pCO_2$ ) based on statistical relationships derived from outputs of HadCM3L, HadSM3 (the latter being the slab-ocean version of HadCM3) and GEOCLIM (used with fixed present-day average lithological fractions), explicitly accounting for the coupled contributions of chemical weathering and physical erosion to continental weathering. These weathering fluxes are instantaneously routed from continental source cells to the closest ocean coastal grid cell via a nearest-neighbour scheme, which remains suitable given the similar grid layouts, both adapted from Scotese and Wright (2018), and the limited knowledge of the Late Devonian hydrological network. A detailed overview of GEOCLIM’s continental weathering module is presented in Maffre et al. (2025), while a complete

description of the emulator’s architecture, training process and topography (Supplementary Figure 1) is documented in Sablon et al. (2025)."

If the same HadCM3-HadSM3 methodology as Sablon was applied, then I find a bit problematic that HadCM3 is only run for 250 years before completing the simulations with HadSM3 (Sablon et al. 2025). How can the response of the ocean circulation to different orbital parameters and CO<sub>2</sub> be adequately captured? I agree that 250 years is probably sufficient for near surface equilibrium but what about the deeper ocean? This can probably be alleviated, at least partly, if the simulations start from previous fully equilibrated HadCM3 simulations but this information is nowhere to be found, and even in this case, the longer-term equilibrium of the HadCM3 simulations should ideally be checked. If the simulations are initialized with idealized conditions, I have a hard time buying that surface ocean is in near-equilibrium without additional diagnostics.

The Reviewer’s concern regarding the relatively short 250-year HadCM3L simulations is entirely valid, given that the deep ocean typically requires several millennia to reach thermal equilibrium. The 250-year spin-up duration used in Sablon et al. (2025), similarly to Araya-Melo (2015), was adopted to ensure that the upper ocean reached near-equilibrium. Considering that the focus of both Sablon et al. (2025) and the present study lies in the continental climate response rather than in the deep ocean, this trade-off was considered acceptable.

Incidentally, under transient astronomical forcing, achieving a fully equilibrated state would in itself be idealized and physically inconsistent with the evolving boundary conditions. Overall, the use of the cGENIE-emulator framework represents a major methodological improvement over the classical cGENIE weathering module (ROKGEN) employed in previous studies.

Araya-Melo, P. A., Crucifix, M., and Bounceur, N.: Global sensitivity analysis of the Indian monsoon during the Pleistocene, *Clim. Past*, 11, 45–61, <https://doi.org/10.5194/cp-11-45-2015>, 2015.

Btw, it should be mentioned somewhere in the text that HadSM3 is the slab-ocean version of the HadCM3 GCM and therefore not a GCM as generally understood.

We thank the Reviewer for pointing out this oversight. This clarification has now been included in the revised manuscript, where HadSM3 is explicitly described as the slab-ocean version of the HadCM3 GCM (see updated description of the emulator just above).

2. As it stands, Figure 2 is rather useless, unless I missed something.

We agree that Figure 2 does not provide essential information in its current form. We will therefore transfer this figure from the main text to the Supplementary Information.

3. Figure 3.

In Gérard et al. (2025) in *Clim. Past*, the global mean O<sub>2</sub> concentration at 370 Ma with preindustrial pCO<sub>2</sub> and pO<sub>2</sub> and mean ocean PO<sub>4</sub> is about 210 mmol/m<sup>3</sup> (Fig. 3 of Gérard et al. 2025). In this manuscript, at ~ 2x preindustrial pCO<sub>2</sub> (550 ppmv), 0.8x preindustrial pO<sub>2</sub> and preindustrial mean ocean PO<sub>4</sub>, the global mean O<sub>2</sub> concentration is 55 mmol/m<sup>3</sup> (Fig. 3). Is it simply the effect of decreased atmospheric O<sub>2</sub> concentration? I find this surprising.

The lower mean  $[O_2]$  obtained in this study compared to Gérard et al. (2025) indeed partly reflects the lower atmospheric  $pO_2$  level used here. However, several additional factors also contribute. First, the mean oceanic  $[PO_4]$  in the present simulations is about 25 % higher ( $2.656 \mu\text{mol.kg}^{-1}$  vs. modern  $2.159 \mu\text{mol.kg}^{-1}$ ; Gérard et al., 2025, Fig. 3), which enhances biological productivity and, consequently,  $O_2$  consumption. Second, the higher  $pCO_2$  tends to reduce global mean  $[O_2]$ , a relationship also reported in Gérard et al. (2025) using the same paleogeography. Finally, the inclusion of the phosphorus recycling feedback in the current setup further intensifies  $O_2$  drawdown in anoxic and dysoxic regions.

Altogether, these combined effects, rather than atmospheric  $pO_2$  alone, account for the discrepancy in mean  $[O_2]$  between the two studies. While their individual contributions cannot be easily quantitatively disentangled within our current framework, the overall trend is consistent with the expected system response to the imposed boundary conditions.

4. Looking at the bathymetric differences between the 370 Ma configuration of Scotese and Verard in Gérard et al. (2025) makes me wonder if a similar sensitivity of  $O_2$  variability would be found with the Verard paleogeography? There are indeed a lot fewer shallow seas in Verard. It could be nice to add some lines about this in the discussion.

The Scotese and V  rard continental reconstructions indeed differ substantially, resulting in distinct ocean circulation patterns and climatic responses (as shown in Gérard et al., 2025). Consequently, it remains uncertain how directly the results of the present study would translate if the same experiments were performed using the V  rard paleogeography, as stated in our original submission on lines 349-351: "Our results could depend on the selected paleogeographic reconstruction, given the substantial uncertainties that persist in deep-time topography and, by extension, in slope, erosion, and weathering patterns".

Exploring alternative continental configurations such as V  rard's would therefore represent an interesting avenue for future work. Notably, the spatial distribution of weathering fluxes would likely differ, since topography, hence surface slope and anticipated model erosion rates, vary considerably between the two reconstructions. This could in turn modulate the global influence of astronomical forcing on mean oceanic  $[O_2]$ .

While we expect the overall global response to be broadly comparable, the distinct ocean circulation patterns and reduced extent of shallow seas in the V  rard configuration could enhance mixing efficiency, likely altering regional  $[O_2]$  variability as well. However, these considerations remain speculative, and a robust assessment would require targeted experiments. To acknowledge this, we propose adding a short note in the discussion highlighting that testing the sensitivity of our results to alternative paleogeographies would be a valuable step for future studies.

Line 351: "... and weathering patterns. It would therefore be valuable for future studies to assess how alternative reconstructions, such as those from V  rard (2019) or Cerme  o et al. (2022), might influence these processes and the resulting oceanic response."

Cerme  o, P., Garc  a-Comas, C., Pohl, A. et al. Post-extinction recovery of the Phanerozoic oceans and biodiversity hotspots. *Nature* 607, 507–511 (2022). <https://doi.org/10.1038/s41586-022-04932-6>

5. l. 237.

I don't get what is remarkable in that the NP region shows no anoxia. It is instead rather expected if this a deep-water formation area (l. 223). It is more remarkable to me that region SA exhibits anoxia if it is indeed a deep-water formation zone, though I guess that the convection area must be quite localized, at the highest latitudes.



Yes, the absence of anoxia in the NP region is indeed expected given its role as a deep-water formation area. The term “remarkable” was therefore inappropriate and will be removed in the revised manuscript to more accurately reflect this point.

Line 237: "Region NP exhibits no anoxic conditions over the period, because of its consistently high  $[O_2]$  and the limited magnitude of  $[O_2]$  variations, which are insufficient for any grid cell in the region to cross the anoxic threshold."

6. Figure 4 and l. 249 and on.

To me, the very weak astronomical effect on  $O_2$  and anoxia in regions NP, Si and WL is a bit overemphasized. At any rate, the purported insolation-driven changes invoked to explain the small variations in regions NP and Si should be shown in a figure, which could replace Fig. 2 for instance.

Regarding the first part of the Reviewer’s comment on the “overemphasis” of astronomical forcing in regions NP, Si, and WL, we believe the text does not overstate the effect. At this stage (line 249 and on), the paragraph only aims to describe the mechanisms driving the simulated regional  $[O_2]$  variations and to link them to the only varying boundary condition in the experiments: astronomical forcing. Moreover, the manuscript already notes (line 233 and line 304) that some regions, such as Si, are largely unaffected by astronomical forcing, making it clear that not all regional  $[O_2]$  variations are significant.

That being said, we agree with the Reviewer that some parts of the current paragraph could be clarified. Specifically, in region Si,  $[O_2]$  variability is not primarily controlled by regional biological productivity ( $R^2 = 0.22$  versus  $> 0.74$  in all other regions), indicating a dominant role of large-scale physical transport and mixing. This is further supported by the strong correlation between  $[O_2]$  in region Si and the northern hemisphere mean ( $R^2 = 0.79$ ), highlighting that circulation rather than regional biological productivity drives the variability. In region NP, the insolation-driven  $[O_2]$  variations are supported by a robust correlation ( $R^2 = 0.66$ ) between the insolation component of biological productivity and  $[O_2]$ , while the nutrient-driven component shows no significant relationship ( $R^2 = 0.01$ , p-value = 0.63). Unless otherwise noted, all correlations are significant with p-value  $< 10^{-3}$ . We propose to revise the paragraph to make these points clearer, explicitly distinguishing the mechanisms controlling  $[O_2]$  variability in regions Si and NP together with the correct related mechanisms.

Lines 244-255: "By definition, variations in anoxic volume arise from changes in regional  $[O_2]$ . Typically, these  $[O_2]$  fluctuations are closely tied to changes in biological productivity and subsequent remineralization. In regions SA, WL, and LG,  $[O_2]$  variability is almost entirely driven by variations in the  $[PO_4]$  component of biological productivity (regional  $R^2 \geq 0.75$  and p-values  $< 10^{-3}$ ). In region NP,  $[O_2]$  variability aligns closely with the insolation component of biological productivity ( $R^2 = 0.66$  and p-value  $< 10^{-3}$ ), whereas the  $[PO_4]$  component shows no meaningful relationship ( $R^2 = 0.01$ , p-value = 0.63). This indicates that insolation-forced biological productivity, rather than  $[PO_4]$ , controls  $[O_2]$  dynamics in this region. Region Si exhibits a distinct behaviour compared with all others. It is the only region where  $[O_2]$  variability is not primarily driven by biological productivity ( $R^2 = 0.22$  and p-value  $< 10^{-3}$ ), indicating the dominance of another mechanism. The strong correspondence between  $[O_2]$  in region Si and the northern hemisphere mean ( $R^2 = 0.79$ , p-value  $< 10^{-3}$ ) suggests that large-scale physical transport and mixing, consistent with strong currents and circulation in this region (see Fig. 7), drive these regional  $[O_2]$  fluctuations. Overall, our results indicate that when regional  $[O_2]$  variability is high, it is primarily driven by the  $[PO_4]$  component of biological productivity. However, when  $[PO_4]$  fluctuations are limited, other processes, such as insolation-forced changes in biological productivity or large-scale advection and mixing, become more critical."

We also modified the last paragraph of the section to improve the general flow and consistency of the text.

Lines 269-281: "In region Si, the relationship between  $[\text{PO}_4]$  and  $\text{PO}_4$  weathering differs fundamentally from that of all other regions. Unlike SA, WL, and LG, where regional  $\text{PO}_4$  weathering clearly imprints on  $[\text{PO}_4]$ , no meaningful correspondence emerges in region Si. The regional  $\text{PO}_4$  weathering flux is comparatively weak (about half that of region LG), and strong currents promote rapid advection and mixing, preventing local accumulation of weathered  $\text{PO}_4$  (see Fig. 7). As a result, regional  $[\text{PO}_4]$  variations do not reflect local weathering input. Instead,  $[\text{PO}_4]$  in region Si closely follows the broader Northern Hemisphere signal ( $R^2 = 0.98$  and  $p\text{-value} < 10^{-3}$ ), indicating that large-scale transport governs its temporal evolution. This behaviour is consistent with the mechanism identified earlier: circulation and mixing dominate both  $[\text{O}_2]$  and  $[\text{PO}_4]$  variability in region Si."

Finally, we propose to add two small clarifications in the discussion section:

Line 310: "... obliquity-driven changes, particularly through their influence on the insolation component of biological productivity."

Lines 312-314: "However, physical processes such as ocean circulation and tracer advection can override this control, as exemplified in region Si, where local  $[\text{O}_2]$  and  $[\text{PO}_4]$  dynamics are decoupled from regional weathering due to strong transport."

7. l. 256-268.

What is the reason for the different lag values in regions SA, WL, LG?

The lag arises because when  $\text{PO}_4$  weathering begins to decline, while still relatively high compared to its mean value, oceanic  $[\text{PO}_4]$  continues to increase. In other words, the  $\text{PO}_4$  input to a given region temporarily exceeds the rate at which it is consumed, leading to a further rise in average  $[\text{PO}_4]$ . Since both the magnitude of the  $\text{PO}_4$  weathering peak and the rate of  $\text{PO}_4$  consumption through biological productivity vary across regions, different lag values are therefore expected among them. We propose to add this precision to the revised manuscript to improve clarity.

Line 261: "...  $[\text{PO}_4]$  continues to rise as long as the  $\text{PO}_4$  input to a given region temporarily exceeds the rate at which it is consumed, producing a lag of several thousand years between the weathering signal and the  $[\text{PO}_4]$  response (see Fig. 6)." Line 265: "... precession cycle). Because both the magnitude of the  $\text{PO}_4$  weathering peak and the rate at which  $\text{PO}_4$  is consumed through biological productivity differ across regions, the resulting lag is region-specific."

8. l. 269-281.

What explains the  $[\text{PO}_4]$  lead in the time series then?

In the manuscript, we showed that  $[\text{PO}_4]$  in region Si correlates strongly with northern hemisphere  $[\text{PO}_4]$ , whereas no clear relationship exists with local  $\text{PO}_4$  weathering, indicating that  $[\text{PO}_4]$  in region Si is mainly driven by external weathering inputs (out of region Si). Because these external sources can exhibit different phase relationships with the astronomical forcing, no consistent lead-lag relationship between  $[\text{PO}_4]$  and  $\text{PO}_4$  weathering is expected in region Si. We believe that the changes made following previous comments 6 and 7 improve the clarity of this point as well, hence requiring no further changes.

It is written that the regional  $[\text{PO}_4]$  signature is strongly influenced by NH weathering outside of the Si region, but there are not a lot more land masses in the NH.



We thank the Reviewer for noting this small inconsistency in our wording. As mentioned above, there is a clear relationship between  $[\text{PO}_4]$  in region Si and that of the northern hemisphere. However, this does not necessarily imply that the evolution of  $[\text{PO}_4]$  in region Si is predominantly driven by weathering fluxes originating from the northern hemisphere itself. Rather, the temporal evolution of the northern hemisphere  $[\text{PO}_4]$  reflects a complex interplay between advection, driven by ocean circulation, and diffusion processes, making it difficult to identify the precise weathering original locations.

Again, modifications following comments 6 and 7 have also improved the clarity of the text regarding this point.

Also, region Si is located right poleward of significant deep upwellings (see the MOC on Fig. 8 of Gérard et al. 2025). Perhaps worth checking whether these upwellings may mask continental  $\text{PO}_4$  inputs from weathering.

While it can be stated that large-scale ocean circulation, including both surface and deep currents, clearly contributes to the mixing of  $[\text{PO}_4]$  across the northern hemisphere, and hence influences  $[\text{PO}_4]$  in region Si, it is not possible within our current experimental design to isolate the exact contribution of local upwellings in masking continental  $\text{PO}_4$  inputs.

Nevertheless, this clarification aligns with one of the general messages of the paper (line 312): "However, physical processes such as ocean circulation and tracer advection can override this control, as exemplified in region Si, where local  $[\text{O}_2]$  and  $[\text{PO}_4]$  dynamics are decoupled from regional weathering due to strong transport."

9. There is no map of the prescribed topography, even though I suppose that steep slopes strongly affect the simulated weathering fluxes. This could be easily added to Fig. 1.

I would appreciate some comments on this.

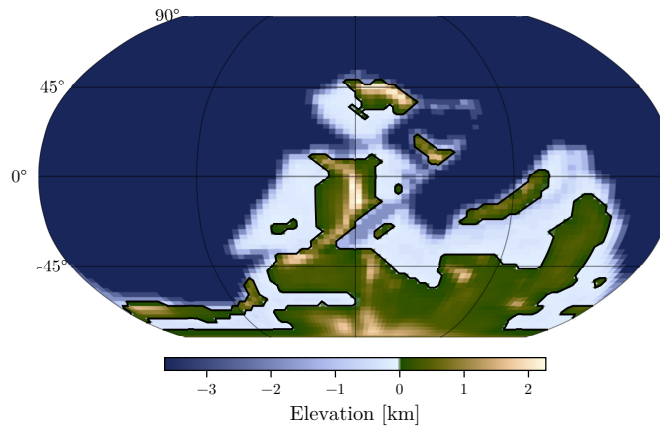

Figure 1: Topography of the late Devonian (370 Ma) according to Scotese and Wright (2018) as presented in Fig. 1 in Sablon et al. (2025).

Yes, topography plays a major role in the simulation of weathering fluxes, by modulating erosion. The reason why Fig. 1 does not display topography is that, in the cGENIE ocean biogeochemistry model, the continental surface is represented as flat. Only a runoff map is prescribed, specifying the direction of continental runoff.

However, the  $\text{PO}_4$  weathering fluxes simulated here do effectively account for topographic slopes. This is because they are computed by the weathering emulator, which is built upon the Scotese paleogeographic reconstruction and therefore incorporates its full topographic information. Consequently, the dependence of weathering fluxes on surface slopes is resolved within the coupled cGENIE–emulator framework. The topography used in the emulator can be found in Sablon et al. (2025, Fig. 1), and we added a Supplementary Figure (see image above) showing it for convenience (now in the revised description of the emulator).

This precision was also explicitly added to the new description of the emulator in the methods section.

10. l. 374.

I am not convinced that the results presented in this manuscript support this. Obliquity-driven changes of a few  $\text{mmol/m}^3$  around of mean of more than 100  $\text{mmol/m}^3$  in regions NP and Si would probably barely affect the sedimentary record.

Our goal in highlighting the obliquity-driven productivity response is not to claim strong sedimentary expression, but to motivate further investigation of the insolation component of biological productivity. We propose to reformulate this sentence to clarify our point.

Lines 372-374: "While eccentricity and precession primarily affect  $[\text{O}_2]$  through their control on  $\text{PO}_4$  weathering fluxes, obliquity exerts its influence by modulating the insolation component of biological productivity at high-latitude, highlighting that even in a greenhouse world, obliquity can leave an imprint on ocean biogeochemistry, hence possibly sedimentary records."

Furthermore, we also understand that the corresponding sentence in the abstract could also benefit from a more nuanced phrasing:

Line 8: "Additionally, global analysis reveals that obliquity variations can leave an imprint on global ocean oxygen levels via their influence on biological productivity, suggesting a potential pathway for obliquity-driven anoxia under greenhouse conditions."

## Second Reviewer: Alexander Farnsworth

Gérard et al. investigate how orbital forcing may have modulated ocean oxygenation during the Late Devonian by altering continental phosphorus ( $\text{PO}_4$ ) weathering fluxes and, in turn, marine productivity and redox state. Specifically, trying to assess the impact of a 2.4 Myr eccentricity cycle is implicated to drive the pacing of anoxic events using cGENIE, an Earth system intermediate complexity model in conjunction with HadCM3Bl temperature and hydrology, GEOCLIM7 and an emulator approach to produce more accurate fluxes containing orbital variation. This allows spatially explicit phosphorus ( $\text{PO}_4$ ) values instead of a single global value, theoretically allowing greater accuracy (both globally and regionally).

Transient and sensitivity simulations show that eccentricity drives a 40 ppm change in  $\text{CO}_2$  showing that  $\text{PO}_4$  is anti-correlated leading to smaller changes in dissolved oxygen on a global level, but much larger regional changes.

This work suggests that orbital forcing alone is not responsible for the Devonian anoxic events (if we believe they were truly global events), but could lead to anoxic states in some regions if the background state was nearer its tipping point.

There is good novelty throughout this manuscript, it is well written and generally well argued. I applaud the authors limitations section, and while there are limitations, it does show what the current state of the art is and ways forward for future modelling of deep-time orbital biogeochemical studies. More can be done (see below) but this open discussion on the matter in the ms is very welcome.

We thank the Reviewer for the constructive and encouraging feedback. We are pleased that the manuscript's novelty, clarity, and discussion of model limitations were appreciated.

### Major comments

Given that the hydrological signal determines a large part of the amount of weathering occurring, can anything be said as to how well the model (HadCM3BL) is representing the hydrological cycle? I suspect there isn't much proxy-data to do this. Likewise, can we constrain the rate of weathering from ROKGEM somehow? Presumably a higher or lower rate of weathering could substantially change these results? Or if another weathering model were used? Some further discussion about the implications of this (as well as the type of rock type being eroded – can we constrain this too?) might be warranted.

Regarding the representation of the hydrological cycle, we acknowledge that assessing the accuracy of the HadSM3 hydrology is challenging given the limited availability of proxy data for direct comparison. Nevertheless, because HadSM3 explicitly resolves key atmospheric processes and has been widely applied in palaeoclimate studies, its use represents a clear and substantial improvement over the simplified hydrological formulation implemented in cGENIE.

Constraining weathering rates in ROKGEM is equally challenging. It is therefore possible that different weathering rates, or the use of an alternative weathering scheme, could affect the quantitative outcomes. However, assessing the magnitude or direction of such differences would require running dedicated simulations. Similarly, Late Devonian lithology is poorly constrained, which is why we rely on present-day average lithological fractions (this information was added to the new description of the emulator, lines 76-85). Overall, we designed our modelling framework using the most suitable tools currently available for this problem, but we fully agree that comparing these results with other weathering models would be an important next step. We propose to add the following sentence to the revised manuscript to acknowledge this:

Lines 353-355: "...astronomical forcing. Similarly, the use of HadCM3L, HadSM3 and GEOCLIM necessarily reflects one possible representation of climate and weathering dynamics; alternative emulator models or hydrological schemes could yield quantitatively different outcomes, although assessing the magnitude of such differences would require dedicated sensitivity experiments."

Likewise, can we constrain at all the predicted background state of the Late Devonian O<sub>2</sub>? Whether the model becomes anoxic/how sensitivity it might be to any change in CO<sub>2</sub>/PO<sub>4</sub> will have an impact on whether it becomes anoxic. I.e. if the background state was already near the threshold, then even small changes might be important.

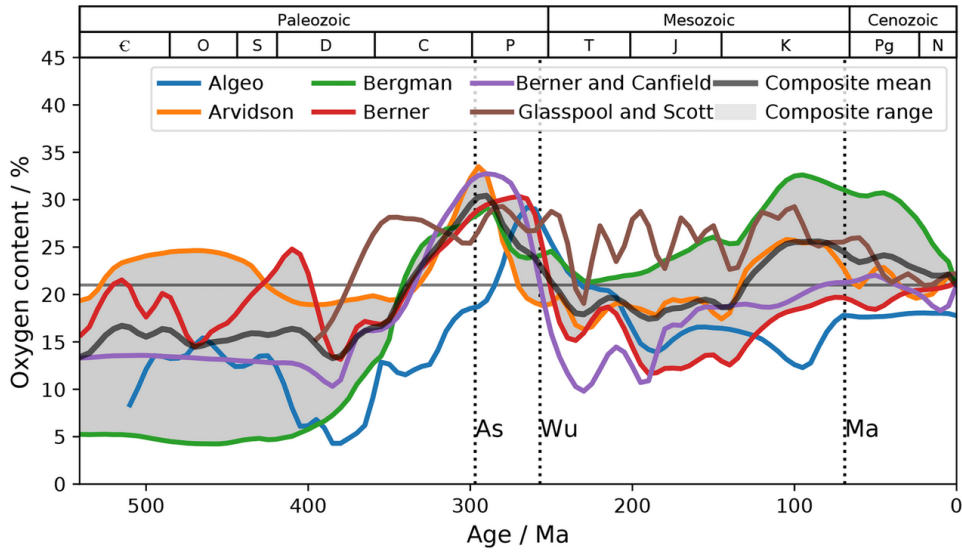

Figure 2: Oxygen content reconstructions in the Phanerozoic taken from Wade et al. (2019).

Constraining the background oxygenation state of the Late Devonian is challenging (see figure above). In this study, we relied on the most up-to-date estimates of key boundary conditions, including atmospheric pCO<sub>2</sub> (Chen et al., 2021; Dahl et al., 2022), mean PO<sub>4</sub> supply (Sharoni and Halevy, 2023), and atmospheric O<sub>2</sub> (Krause et al., 2018; Mills et al., 2023). Under these constraints, cGENIE simulates a background ocean state that is already strongly deoxygenated. We agree with the Reviewer that such a background state inherently increases the system's sensitivity to perturbations. When the ocean is already near threshold, even modest changes can push regions into anoxia. We see this as consistent with the broader hypothesis that the Late Devonian ocean was predisposed to anoxia, and our results provide modelling support for this interpretation. We propose to add the following sentence to the discussion:

Lines 284-286: "... Devonian ocean oxygenation. Our simulations indicate that the Late Devonian background state was already characterised by low oceanic [O<sub>2</sub>], which likely contributed to the increased frequency of anoxic events observed throughout this period Becker et al. (2020)."

Finally, we acknowledge that the background state and its sensitivity to forcing reflect the behaviour of a single model configuration. Although we refined several aspects of our setup (PO<sub>4</sub> weathering, wind stress, albedo), cGENIE inevitably suffers from internal limitations. We therefore view this work as a first, internally consistent estimate of Late Devonian oxygenation. We propose to explicitly highlight this in the limitations section:

Lines 362-365: "... of climate-circulation–biogeochemistry interactions. They could also explicitly test the robustness of the Late Devonian background state and its sensitivity to evolving external forcing across multiple models."

Wade, D. C., Abraham, N. L., Farnsworth, A., Valdes, P. J., Bragg, F., and Archibald, A. T.: Simulating the climate response to atmospheric oxygen variability in the Phanerozoic: a focus on the Holocene, Cretaceous and Permian, *Clim. Past*, 15, 1463–1483, <https://doi.org/10.5194/cp-15-1463-2019>, 2019.

Was an ice sheet prescribed from the paleogeography (Famennian) in cGENIE? It is suggested that the Late Devonian may have had one present. Scotese and Wright do not explicitly have one, however one was artificially added into the Valdes et al. simulations (change in orography and albedo). Is there a potential disconnect here? If so, what impact could this have on fluxes and ocean circulation in cGENIE and in turn anoxia on a global and regional level?

All boundary-condition files used in cGENIE for albedo, orography, and wind stress were taken directly from the HadCM3BL output of Valdes et al. (2021). This ensures smooth continuity between the two models regarding prescribed orography and albedo profiles.

cGENIE does not incorporate dynamic ice sheets or sea-level changes. We therefore acknowledge that this model is not the optimal tool for assessing ice-sheet feedbacks or their climatic consequences. This limitation is already noted in the manuscript lines 357–359: "The exclusion of ice sheets and sea-level variations removes critical mechanisms through which obliquity can strongly impact  $[O_2]$ , although the accurate representation of sea-level changes would remain challenging at the cGENIE grid resolution."

How well does cGENIE represent modern climate and ocean biogeochemistry? How sensitive is the model to changes in nutrient fluxes and/or  $CO_2$ . I may have missed it, but some references or discussion to justify that cGENIE and GEOCLIM adequately produces

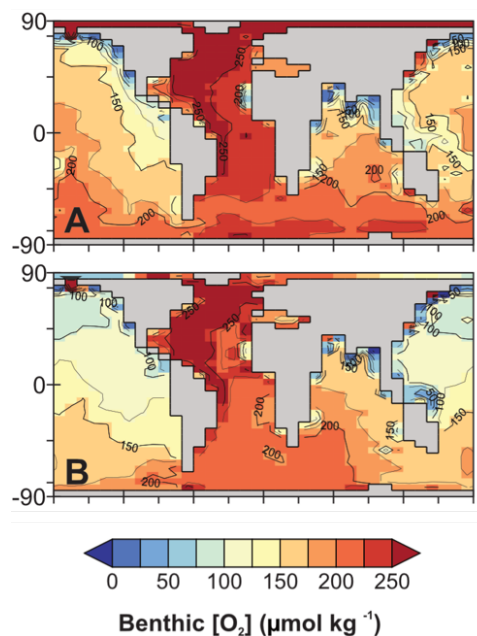

We are confident in cGENIE's ability to reasonably simulate paleoclimate conditions, as the model performs well in reproducing key aspects of modern climate and ocean biogeochemistry. In terms of the global ocean circulation, cGENIE realistically captures large-scale variations in

the AMOC, as recently shown in Gérard and Crucifix (2024), where simulated AMOC changes closely follow those produced by CMIP5 models. cGENIE also accurately represents modern dissolved oxygen concentrations and spatial patterns (Ridgwell et al., 2007), supporting its suitability for studies of ocean redox dynamics. As an illustration, the figure above (modified after Pohl et al., 2022) displays the benthic oxygen concentrations after the World Ocean Atlas 2018 (re-gridded to the model resolution; top panel) and after the standard modern cGENIE simulation (bottom panel). Benthic oxygen concentrations are underestimated in the Southern Ocean and North Pacific as a result of too weak an Antarctic circumpolar current, which results from the difficulty in accurately representing the Drake Passage at the model resolution. Except for this bias, cGENIE captures well first-order spatial patterns and values. This ability of cGENIE to capture essential climate and biogeochemical processes was already highlighted in the manuscript on lines 338–343. In response to the Reviewer’s point, we propose to further clarify the text as follows:

Lines 343: "... Stappard et al., 2025). Collectively, these studies strengthen confidence in our results and demonstrate that cGENIE represents a reliable tool for simulating paleoclimate conditions and associated biogeochemical responses."

cGENIE sensitivity to changes in  $\text{PO}_4$  supply and atmospheric  $\text{pCO}_2$  has been extensively assessed in Gérard et al. (2025). There, we show, for instance, that doubling  $\text{pCO}_2$  produces a radiative forcing of approximately  $4 \text{ W m}^{-2}$ , resulting in a global mean surface warming of about  $3^\circ\text{C}$  in our simulations. We chose not to incorporate these detailed results (and others) into the present manuscript to keep the study as straightforward and clear as possible.

The same reasoning applies to material related to GEOCLIM. Although the present study builds directly on Sablon et al. (2025), we chose to avoid repeating content that is already extensively covered there, including the description, performance, and validation of GEOCLIM. All relevant information can therefore be found in Sablon et al. (2025), now accepted. This preserves a clear distinction between the two studies and limits redundancy.

How appropriate is the emulator at representing Deep time periods?

- Was the emulator trained on Quaternary time periods?

This type of climate emulator has indeed been applied to Quaternary studies using HadSM3, for example, in Araya-Melo et al. (2015), Sun et al. (2019), and Lord et al. (2017). However, the emulator used in the present work was trained on a Devonian-specific ensemble of experiments. An emulator is fundamentally a statistical model calibrated on a given training dataset; consequently, the one developed here cannot be applied to Quaternary conditions.

Importantly, the emulator employed in this study successfully passes standard validation tests, demonstrating that it is an appropriate surrogate for the corresponding Hadley Centre model under Devonian boundary conditions. Compared with the earlier Quaternary-focused implementations, the emulator framework includes several methodological improvements (Sablon et al., 2025). These enhancements have not yet been implemented in a Quaternary context.

- Is the La11a-based orbital solution (123.3–122.2 Ma in the original chronology) applicable to your time frame? Granted the Devonian-specific solution (e.g. Zeebe & Lantink 2024) came out while your study was already running, but do you think your results would be different if it were used?



Zeebe & Lantink (2024) do not provide a single orbital solution for the Devonian but rather a suite of solutions, reflecting the intrinsic chaotic nature of Solar System dynamics over such long timescales. This chaotic behaviour makes it impossible to reconstruct a unique, precise evolution of eccentricity or inclination beyond a certain temporal horizon.

That said, the astronomical solution employed here shares the same frequency content and amplitude-modulation structure as those found across the Zeebe–Lantink ensemble. In particular, the solution we adopted exhibits a resonance between inclination ( $s_3 - s_4$ ) and eccentricity ( $g_3 - g_4$ ), producing an obliquity amplitude-modulation pattern that aligns with the 2.4-Myr eccentricity nodes. This behaviour is common across many plausible Devonian solutions and is also present in a majority of the Zeebe–Lantink solutions. Nonetheless, we acknowledge that alternative resonance regimes are possible for the Devonian.

Regarding the potential impact of using a different orbital solution, we mentioned in the manuscript that cGENIE responds relatively directly to the astronomical forcing imposed (Lines 322–323). Therefore, we believe that the core results would remain largely the same. The most pronounced deoxygenation would still occur near eccentricity maxima, and the system would still exhibit strong spatial heterogeneity in its response. However, explicitly running simulations using different astronomical solutions would be needed to further demonstrate this point.

Araya-Melo, P. A., Crucifix, M., and Bounceur, N.: Global sensitivity analysis of the Indian monsoon during the Pleistocene, *Clim. Past*, 11, 45–61, <https://doi.org/10.5194/cp-11-45-2015>, 2015.

Sun, Y., Yin, Q., Crucifix, M. et al. Diverse manifestations of the mid-Pleistocene climate transition. *Nat Commun* 10, 352 (2019). <https://doi.org/10.1038/s41467-018-08257-9>

Lord, N. S., Crucifix, M., Lunt, D. J., Thorne, M. C., Bounceur, N., Dowsett, H., O’Brien, C. L., and Ridgwell, A.: Emulation of long-term changes in global climate: application to the late Pliocene and future, *Clim. Past*, 13, 1539–1571, <https://doi.org/10.5194/cp-13-1539-2017>, 2017.

Further questions relating to some of the studies limitations:

- Flat bottom bathymetry in the palaeogeography – what role could this play on ocean anoxia? Or indirectly through unrealistic ocean circulation?

We fully agree with Reviewer 2 that uncertainties in Devonian paleogeography are substantial. This was already highlighted in our original submission (lines 349–351), and we expanded on this point in response to Reviewer #1 (Line 351: "... and weathering patterns. It would therefore be valuable for future studies to assess how alternative reconstructions, such as those from V  rard (2019) or Cerme  o et al. (2022), might influence these processes and the resulting oceanic response").

Regarding the deep-ocean bathymetry specifically, we anticipate the latter to largely impact benthic oxygen concentrations in the model (based on the sensitivity test to deep-ocean bathymetry conducted in Pohl et al. (2022) over the last 140 Myr, see their extended data fig. 6). It is also likely that resulting changes in the global ocean circulation may induce changes in the intensity of the return of the nutrients from the deep ocean to the upper ocean, hence modulating export production intensity at the global scale. Beyond

these potential changes in ‘background’ oceanic conditions, we do not expect the deep-ocean bathymetry to largely impact our main results regarding the modulation of ocean anoxia by astronomical forcing. This is mainly because our study focuses on the upper ocean (since this is where deep-time sedimentary records are preserved).

- How appropriate is cGENIE in resolving the large scale ocean circulation, especially at orbital timescales? E.g. AMOC collapse on LGM timescales?

In Gérard and Crucifix (2024), the cGENIE large-scale ocean circulation was validated against CMIP5 models (this is now explicitly mentioned in the revised manuscript). In the same study, transient hysteresis experiments of the AMOC were conducted over timescales of 20 000 to 40 000 years. Furthermore, another hysteresis of the large-scale ocean circulation was performed with cGENIE in Gérard et al. (2025) over a period of 150 000 years. Altogether, this provides confidence in cGENIE’s ability to represent large-scale ocean circulation at orbital timescales.

- Have any specific assumptions on nutrient and other co-varying fluxes been made?

All assumptions relevant to how nutrients and associated fluxes are treated in our setup are explicitly stated in the manuscript. The key ones include: (1) the  $\text{PO}_4$  weathering and delivery in an open system handled by the emulator of Sablon et al. (2025); (2) the single-nutrient ( $\text{PO}_4$ ) control on marine productivity, which is standard in palaeo-biogeochemical modelling (Ridgwell et al., 2007); and (3) the sediment module options employed here, notably organic carbon burial and P recycling, following Hülse and Ridgwell (2025, now published).

- How much can we trust available proxy-date? Good enough and well constrained age model? Are there different interpretations for these Devonian deposits? Can we truly determine whether this was a global event from them alone?

Geological proxy data provide crucial constraints on the duration, recurrence, and broad geographic extent of Devonian anoxic events, but they remain limited by sparse spatial coverage, dating uncertainties, and interpretative ambiguity. As a consequence, different stratigraphic records sometimes lead to contrasting reconstructions, and it is challenging to determine from data alone whether any given anoxic episode was truly global, synchronous, or uniform across the open ocean. This is precisely where climate–biogeochemical modelling becomes valuable: models allow us to test different scenarios suggested by the proxy record. Our results, for example, offer a mechanism explaining why sedimentary archives from distinct regions may record different expressions of an astronomical signal, despite being part of the same large-scale climatic context.

If HadCM3 circulation was used to initialise this work, how much memory of it persists through the orbital cycle? I suspect (not much once the orbital starts to change significantly) not much, which is good because you want ocean circulation to respond. However, does this then rely on cGENIE ocean circulation being appropriate? And if so, is it?

We agree that, even if the simulations were initialised using a circulation field derived from HadCM3L, the memory of this initial state would decay rapidly. Once the orbital forcing begins to vary, cGENIE’s own ocean circulation dynamics takes over, and the influence of any externally prescribed initial circulation would be lost well before completing a precession cycle. But is the ocean circulation of cGENIE appropriate to handle such a task? While cGENIE is

not a full-complexity GCM, we have confidence in its ability to represent large-scale circulation and its variability. We elaborated on this point in response to a previous comment ("How well does cGENIE represent modern climate and ocean biogeochemistry?") and hope that the revised manuscript now adequately addresses the Reviewer's concern.

## Minor comments

The introduction was nicely written highlighting why orbital variability is worthy to look at. However, I wonder if a sentence of two explaining how orbital forcing imprints itself onto changes in ocean biogeochemistry, e.g. through changes to ocean circulation, hydrological changes leading to change in nutrient input, etc. . .

Thank you for the suggestion. We agree that the text could benefit from several clarifications on how astronomical forcing leaves an imprint on ocean anoxia. We propose to revise the following sentence, which now also explicitly presents the working hypothesis of our study:

Lines 26-27: "There is also growing evidence that astronomical forcing could modulate at least some of these events, primarily through a "top-down" mechanism (Carmichael et al., 2019) whereby cyclic changes in temperature and precipitation alter continental nutrient fluxes to the ocean (De Vleeschouwer et al., 2014; De Vleeschouwer et al., 2017; Wichern et al., 2024; Huygh et al., 2025)."

It might be worth a small paragraph discussing the proxy-evidence for this time period? How reliable was it? Are they globally distributed? Etc. . .

We understand the Reviewer's suggestion to include a brief discussion of the proxy evidence. However, a challenge arises in that our study does not focus on any specific Late Devonian anoxic event. The reliability, spatial distribution, and interpretative uncertainties of proxy records vary substantially from one event to another. Providing a concise yet accurate overview for all of them would therefore require a level of detail that would shift the introduction away from its primary purpose.

Our goal within the introduction is simply to highlight that astronomical signals have been reported across several Late Devonian anoxic intervals, and to motivate a more general exploration of the link between astronomical forcing and anoxia using numerical modelling. Hence, we believe the introduction is clearer and more coherent in its current form, without additional event-specific proxy details.

When the PO<sub>4</sub> flux was routed to coastal tiles, was the total amount for each watershed basin averaged between each coastal grid cell? Or where higher concentrations routed through large river systems (river exit node)? I suspect it's the later unless paleo-rivers were determined?

In our implementation, weathering from continental grid cells is not averaged over watershed basins nor routed through explicit river networks. Instead, we use a simple nearest-neighbour routing scheme: each continental cell is mapped to the geographically closest ocean-coastal cell (based on haversine distance), and its entire weathering flux is delivered directly to that coastal cell. This procedure does not make assumptions about paleo-topography or paleo-river pathways, and thus does not distinguish large river outlets from small ones.

HadSM3? Do you mean HadCM3? The 'S' implied a slab ocean model was used. However, I suspect the outputs from Valdes, 2021 was used as initialised this work, then it's the full AOGCM version (HadCM3BL).

We apologise for the confusion. In Sablon et al. (2025), both the fully coupled model and the slab-ocean model were used to build the emulator. We have double-checked the manuscript, and the distinction between HadSM3 and HadCM3L is used correctly throughout. We have now clarified in the revised text that HadSM3 refers specifically to the slab-ocean version. We also agree that referring to the coupled model as HadCM3L will improve precision, and we will update the manuscript accordingly. Although HadCM3BL could arguably be used in specific locations instead of HadCM3L, we find that referring only to HadCM3L is preferable to avoid any misinterpretation. Finally, to maintain consistency with the use of a slab model, we propose removing the term “fully coupled” from line 42.

What value of CO<sub>2</sub> did the HadCM3BL late Devonian use?

The pCO<sub>2</sub> is 926 ppm, which is now clearly stated in the revised manuscript. We apologise for the oversight.

Line 44 – Change GEOCLIM to GEOCLIM7

The emulator used in this study was trained on GEOCLIM6.1.0. We cite Maffre et al. (2025) because the updates introduced in that version (GEOCLIM7) only concern ocean biogeochemistry, which is not involved in the emulator training. Furthermore, the paper provides a complete description of the model components relevant to our work (including DynSoil). To avoid any misunderstanding, we propose to keep the text as it, with all the details available in Sablon et al. (2025).

Line 188 – “This inverse relationship occurs because intensified weathering”, would this not be dependent on the type of rock that is being eroded?

Although GEOCLIM allows for an explicit spatial distribution of lithological fractions, this option was not used in our study; instead we applied present-day average lithology values. While the magnitude and shape of the weathering response do depend on lithology, the direction does not: in GEOCLIM, any increase in silicate weathering necessarily produces an increase in phosphorus weathering, because the two fluxes are explicitly coupled in the model formulation.

Line 194:195 – “This outcome arises from the physical processes encoded in the emulator developed by Sablon et al. (2025), where the same feature was previously identified.” Presumably driven by the hydrology? Can you say whether it was simply an enhancement of the hydrological cycle globally? Or was it changes in the location of precipitation maxima (e.g. changes in storm tracks) moving poleward/equatorward over regions with more erodible material (i.e. mountains vs flat regions?) leading to a greater PO<sub>4</sub> flux? Is the model complex enough to shed any light on this?

The atmospheric forcing of weathering and erosion is supplied indirectly through the HadSM3-based emulator, which provides spatially explicit temperature and runoff fields. With DynSoil enabled, GEOCLIM is indeed complex enough to represent spatial variations in the hydrological cycle, so both a global intensification of runoff and regional shifts in precipitation can influence local erosion and PO<sub>4</sub> export. In our simulations, the dominant driver is the precession-sensitive monsoon system captured by the emulator: precession alters monsoon intensity and distribution, which directly modulates the spatial pattern of runoff and thus weathering and PO<sub>4</sub> delivery. We propose to add this in the revised manuscript to improve clarity:

Lines 193-195: "... modulation can reach 10.5%. In our simulations, the dominant driver is the precession-sensitive monsoon system captured by the emulator: precession alters monsoon intensity and distribution, which directly modulates the spatial pattern of runoff and thus weathering and PO<sub>4</sub> delivery. Beyond this, eccentricity is positively correlated with PO<sub>4</sub> weathering, such that periods of high eccentricity are associated with enhanced oceanic [PO<sub>4</sub>], a feature already identified and documented in Sablon et al. (2025)."

Line 220 – How well does the model represent shallow marine settings?

In cGENIE, this ability is primarily constrained by model resolution. Vertically, the use of the 16-layer logarithmically spaced grid provides higher resolution near the surface, which improves the representation of shallow-water processes. However, the resolution remains relatively low, with the first layer being 60 m thick. Horizontally, the 36×36 (equal-area) grid also limits cGENIE's ability to resolve highly localized environments.

However, the shallow-marine representation in cGENIE is often more strongly influenced by the underlying palaeogeographic reconstruction than by numerical resolution. As shown in Gérard et al. (2025), different continental configurations can lead to substantial differences in shelf extent, water depth, and connectivity. In this context, the resolution used here remains adequate for capturing and representing biogeochemical conditions in shallow marine settings. This is well illustrated by previous work using cGENIE to help interpret proxy data produced in coastal paleoenvironments. For instance, He et al. (2024) demonstrated that cGENIE permits explaining the contrasting redox changes that occurred in shallow-water environments – such as documented on I/Ca measured in carbonates – during the late Cambrian Steptoean positive carbon isotope excursion (SPICE). Pohl et al. (2021) similarly explained shallow-water I/Ca data during the Late Ordovician, and Hülse et al. (2021) simulated the spread and spatial patterns of euxinia onto the continental shelves in line with proxy records during the Permian-Triassic transition.

He, R., Pohl, A., Prow, A., Jiang, G., Huan, C. C., Saltzman, M. R., and Lu, Z. (2024). The dynamic ocean redox evolution during the late Cambrian SPICE: Evidence from the I/Ca proxy. *Global and Planetary Change*, 233, 104354.

Line 229:237 – Why does the Si region have such a high O<sub>2</sub> background state? Any idea why?

This results from strong transport and mixing linking the Si region to the broader Northern Hemisphere circulation. As a consequence, dissolved O<sub>2</sub> from the atmosphere is efficiently advected into the Si region, leading to a comparatively high background O<sub>2</sub> state. This information has been added to the following revised paragraph:

Lines 244-255: "By definition, variations in anoxic volume arise from changes in regional [O<sub>2</sub>]. Typically, these [O<sub>2</sub>] fluctuations are closely tied to changes in biological productivity and subsequent remineralization. In regions SA, WL, and LG, [O<sub>2</sub>] variability is almost entirely driven by variations in the [PO<sub>4</sub>] component of biological productivity (regional  $R^2 \geq 0.75$  and p-values  $< 10^{-3}$ ). In region NP, [O<sub>2</sub>] variability aligns closely with the insolation component of biological productivity ( $R^2 = 0.66$  and p-value  $< 10^{-3}$ ), whereas the [PO<sub>4</sub>] component shows no meaningful relationship ( $R^2 = 0.01$ , p-value = 0.63). This indicates that insolation-forced biological productivity, rather than [PO<sub>4</sub>], controls [O<sub>2</sub>] dynamics in this region. Region Si exhibits a distinct behaviour compared with all others. It is the only region where [O<sub>2</sub>] variability is not primarily driven by biological productivity ( $R^2 = 0.22$  and p-value  $< 10^{-3}$ ), indicating the dominance of another mechanism. The strong correspondence between [O<sub>2</sub>] in region Si and

the northern hemisphere mean ( $R^2 = 0.79$ , p-value  $< 10^{-3}$ ) suggests that large-scale physical transport and mixing, consistent with strong currents and circulation in this region (see Fig. 7), drive these regional  $[O_2]$  fluctuations. Overall, our results indicate that when regional  $[O_2]$  variability is high, it is primarily driven by the  $[PO_4]$  component of biological productivity. However, when  $[PO_4]$  fluctuations are limited, other processes, such as insolation-forced biological productivity changes or large-scale advection and mixing, can become more apparent."

Line 327:329 – Assuming that the model is adequately capturing the background state correctly?

Yes, regarding anoxia, this assumes that the model adequately captures the background state, since anoxia is defined relative to a fixed  $[O_2]$  threshold. A different background state could therefore produce substantially different anoxic patterns. However, this does not apply to absolute  $[O_2]$  variations, which would remain largely unaffected by shifts in the background state. In the manuscript, we chose to highlight anoxic volume variations because they are widely used and understood across both the geological and modelling communities. Importantly, this choice is not misleading, as we have enough confidence in the model's ability to reproduce the relevant background state. This is because the model performs well in the modern and past, and because we relied on the most up-to-date estimates of key boundary conditions.

Line 329:330 – "Our results also suggest that anoxic events could manifest as a succession of smaller, transient episodes". How does this tally with the earlier suggestion that there isn't much memory in the system?

We apologise for the confusion. What we mean here is that the multiple anoxic peaks closely follow the precession cycles. This behaviour is therefore not related to any memory in the system but simply reflects the temporal structure of the astronomical solution itself. This point matters because anoxic events are often thought of as single, large, continuous episodes (e.g. the nutrient gun hypothesis from De Vleeschouwer et al., 2017), whereas our simulations show that they could instead occur as several short-lived peaks paced by the astronomical forcing. This result aligns with the idea, proposed in previous studies such as Hedhli et al. (2023), that certain Devonian anoxic events may in fact consist of multiple successive pulses. We thank the Reviewer for identifying the lack of clarity of our original phrasing and propose to revise the sentence as follows:

Lines: 329-330: "Our results also suggest that anoxic events could manifest as a series of smaller, short-lived, precession-paced episodes (see Fig. 4c and supplementary video) rather than a single, prolonged global event, similar to the scenario proposed by Hedhli et al. (2023)."

Will the simulations be made available to the community?

Yes. In line with cGENIE's open-science policy, we will provide all the files required to fully reproduce the simulations. Rather than distributing the raw model outputs, we will supply the complete set of configuration and input files, ensuring full transparency of the experimental design and allowing users to easily rerun or adapt the experiments for their own purposes. We also plan to deposit the three main simulations on Zenodo to further enhance accessibility of the results to the community.
